# Supplementary material for: Preparation of diverse flower-like ZnO nanoaggregates for dye-sensitized solar cells
Source: Royal Society of Chemistry journal article supplement (doi:10.1039/c5ra01938a), 2015-01-01
Supplement: c5ra01938a1.pdf [file c5ra01938a1.pdf]

**Supplementary Information For**  
**Preparation of diverse flower-like ZnO nanoaggregates for**  
**dye-sensitized solar cells**

Liping Lin,<sup>a,b</sup> Xiao Peng<sup>a</sup> and Si Chen<sup>a</sup> , Bao Zhang<sup>a\*</sup>, Yaqing Feng<sup>a,b\*\*</sup>

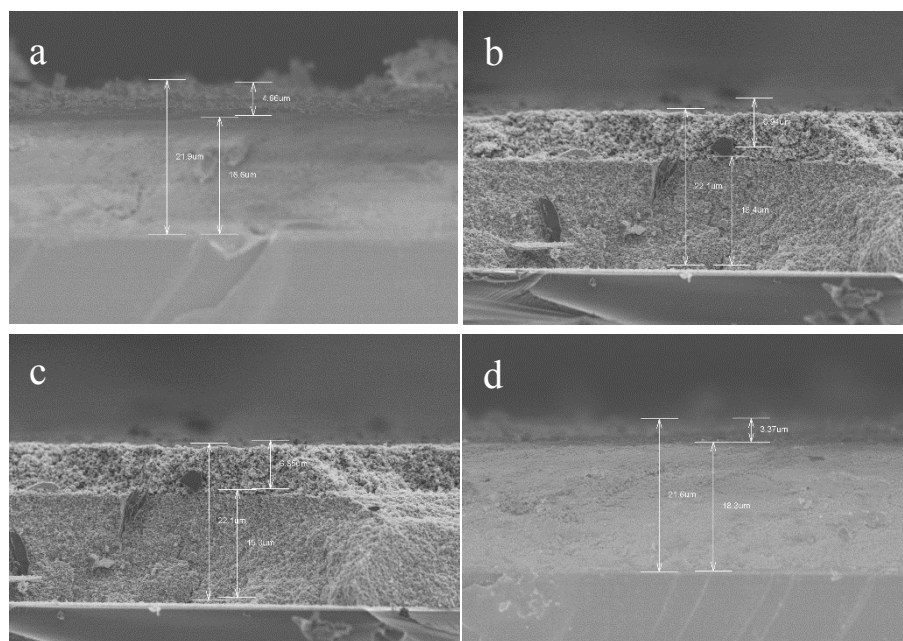

**Fig. S1** The SEM images of the films of DSSCs based on sample **1** (a), **2** (b), **3** (c) and NP (d)

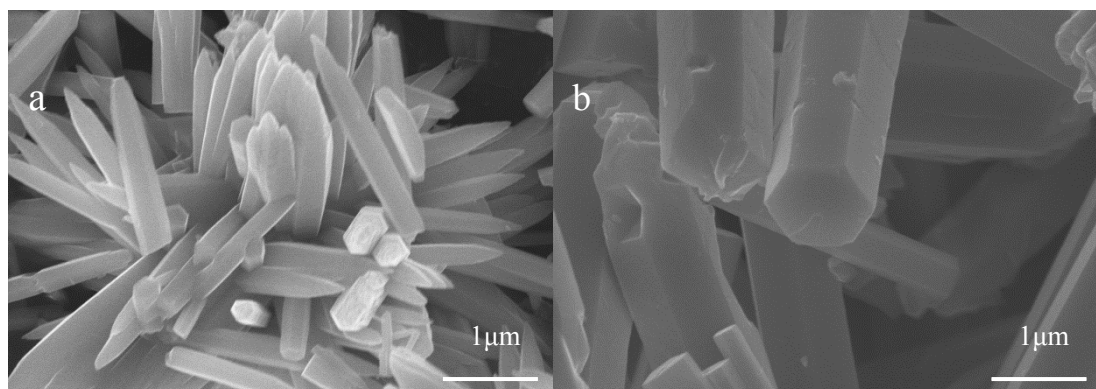

**Fig. S2** The SEM images of the nanorods when there is no glutamic acid

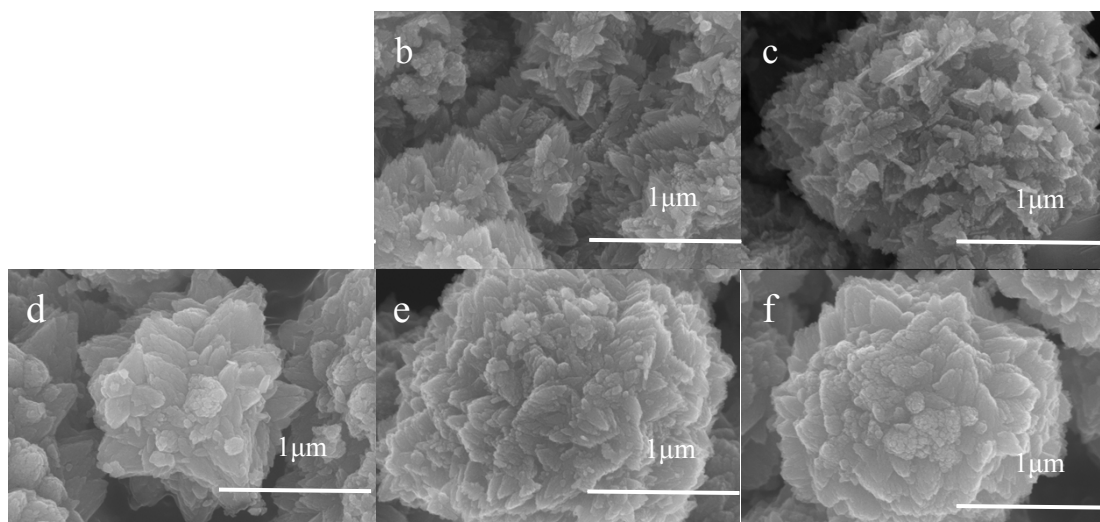

**Fig. S3** The SEM images of the growing process of sample 1, a~f stand for reaction time 0.5h, 1h, 2h, 4h, 6h, 8h respectively

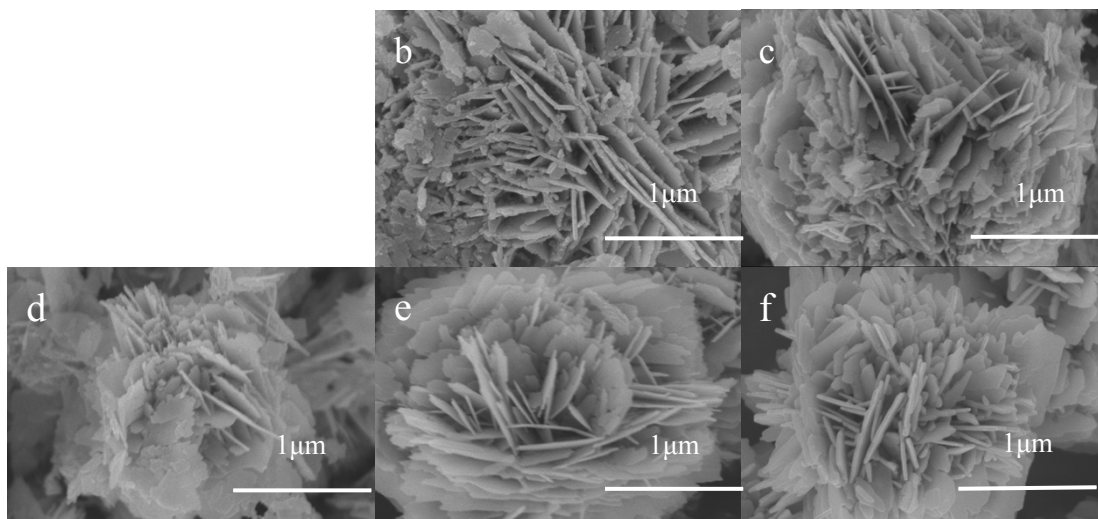

**Fig. S4** The SEM images of the growing process of sample 2, a~f stand for reaction time 0.5h, 1h, 2h, 4h, 6h, 8h respectively

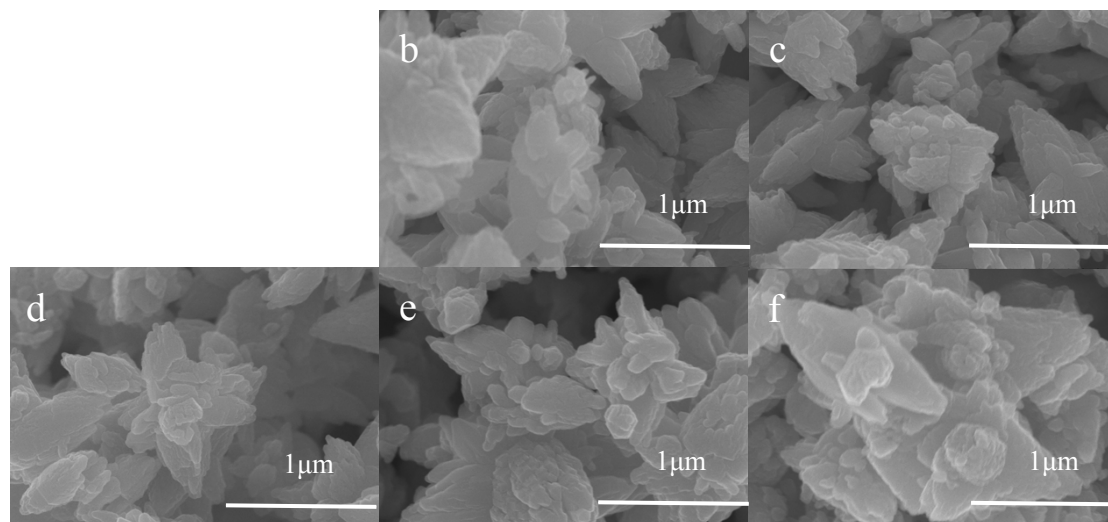

**Fig. S5** The SEM images of the growing process of sample **3**, a~f stand for reaction time 0.5h, 1h, 2h, 4h, 6h, 8h respectively
